# Supplementary material
Source: PubMed Central journal article supplement (PMC4787305)
Supplement: Jenm625558.wt1_default.pdf [file Jenm625558.wt1_default.pdf]

**Webtable 1** Quintiles of circulating 25-(OH)D3 concentration and the risk of cancers of the colorectum, colon, and rectum.

| Quintile cut-points (nmol/L) | Quintiles of circulating 25-(OH)D3 concentration |                     |                     |                     |                     | P for trend |
|------------------------------|--------------------------------------------------|---------------------|---------------------|---------------------|---------------------|-------------|
|                              | 1 (reference)                                    | 2                   | 3                   | 4                   | 5                   |             |
|                              | ≤40.2                                            | >40.2 to ≤52.6      | >52.6 to ≤65.1      | >65.1 to ≤83.4      | >83.4               |             |
| <b>Colorectum</b>            |                                                  |                     |                     |                     |                     |             |
| Mean (SD), median (nmol/L)   | 31.2 (6.7), 32.3                                 | 46.6 (3.8), 46.4    | 58.5 (3.6), 58.5    | 73.7 (5.0), 73.4    | 108.9 (32.4), 101.9 |             |
| No. cases/controls           | 307/251                                          | 261/247             | 249/52              | 250/249             | 181/249             |             |
| Matching factors*            | 1.00                                             | 0.86 (0.67 to 1.10) | 0.79 (0.61 to 1.02) | 0.79 (0.62 to 1.02) | 0.58 (0.45 to 0.75) | <0.001      |
| Multivariate adjusted†       | 1.00                                             | 0.91 (0.71 to 1.18) | 0.78 (0.60 to 1.02) | 0.80 (0.61 to 1.04) | 0.60 (0.46 to 0.80) | <0.001      |
| <b>Colon</b>                 |                                                  |                     |                     |                     |                     |             |
| Mean (SD), median (nmol/L)   | 31.6 (6.2), 33.0                                 | 46.9 (3.8), 46.6    | 58.6 (3.7), 58.5    | 73.7 (4.9), 73.4    | 106.8 (26.6), 99.1  |             |
| Number of cases/controls     | 206/150                                          | 166/158             | 162/64              | 146/152             | 105/161             |             |
| Matching factors*            | 1.00                                             | 0.76 (0.56 to 1.03) | 0.69 (0.50 to 0.95) | 0.66 (0.48 to 0.92) | 0.46 (0.33 to 0.64) | <0.001      |
| Multivariate adjusted†       | 1.00                                             | 0.77 (0.56 to 1.06) | 0.65 (0.46 to 0.92) | 0.66 (0.47 to 0.93) | 0.47 (0.33 to 0.68) | <0.001      |

| Quintile cut-points (nmol/L) | Quintiles of circulating 25-(OH)D3 concentration |                     |                     |                     |                     | P for trend |
|------------------------------|--------------------------------------------------|---------------------|---------------------|---------------------|---------------------|-------------|
|                              | 1<br>(reference)                                 | 2                   | 3                   | 4                   | 5                   |             |
|                              | ≤40.2                                            | >40.2 to ≤52.6      | >52.6 to ≤65.1      | >65.1 to ≤83.4      | >83.4               |             |
| <b>Rectum</b>                |                                                  |                     |                     |                     |                     |             |
| Mean (SD), median (nmol/L)   | 30.5 (7.4), 32.0                                 | 46.1 (3.8), 45.8    | 58.3 (3.4), 58.5    | 73.7 (5.2), 73.5    | 112.6 (40.9), 104.1 |             |
| Number of cases/controls     | 101/101                                          | 95/89               | 87/88               | 104/97              | 76/88               |             |
| Matching Factors*            | 1.00                                             | 1.08 (0.62 to 1.63) | 0.99 (0.66 to 1.50) | 1.06 (0.71 to 1.58) | 0.86 (0.56 to 1.32) | 0.573       |
| Multivariate adjusted†       | 1.00                                             | 1.29 (0.82 to 2.02) | 1.06 (0.67 to 1.67) | 1.18 (0.76 to 1.84) | 0.89 (0.56 to 1.43) | 0.647       |

Values are incidence rate ratio (95% confidence interval). \*Model based on matching factors only. †Model based on matching factors plus further adjustments for smoking status/duration/intensity, body mass index, total physical activity, education level, total dietary energy consumption, and intake of total fruits, vegetables, meats/meat products, and alcohol. Values for mean and median are based on control participants only.
